# Supplementary material
Source: PubMed Central journal article supplement (PMC2850031)
Supplement: pp.109.152728_1.pdf [file pp.109.152728_1.pdf]

# Supplementary Figure 1

**Supplementary Figure 1:** Phenotype of *msh1* and *recA3* mutants after heat stress of 37°C for approximately 24 hours. Pictures were taken 3 days after returning to 24°C following the heat treatment.

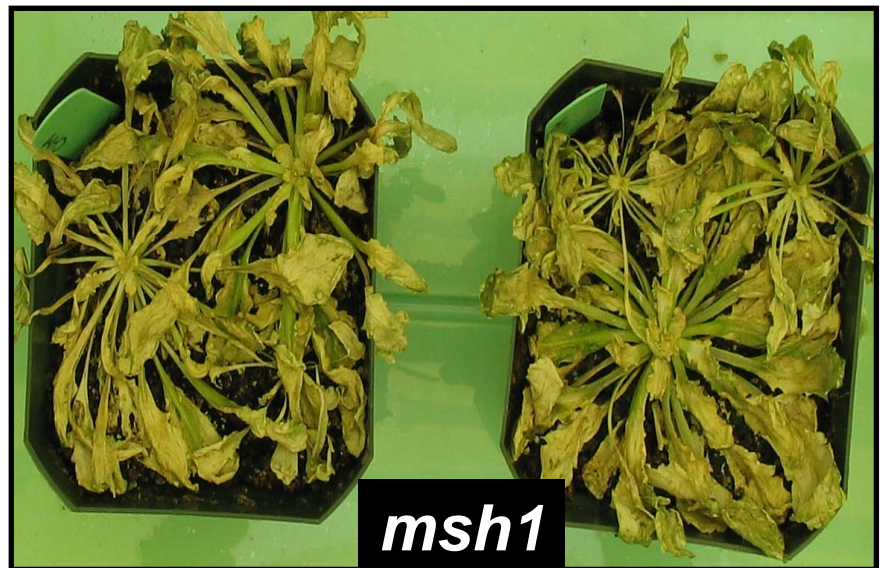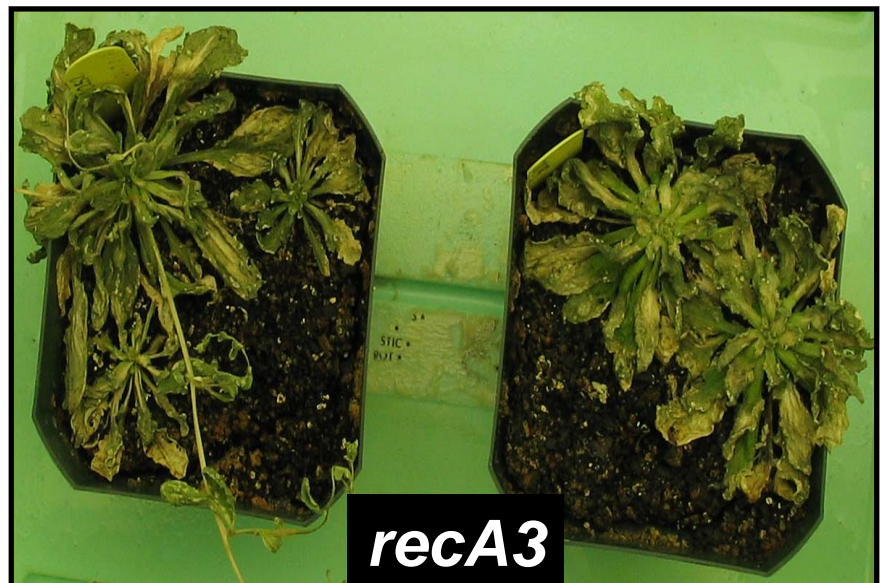

**Supplementary Table 1: Putative stress responsive genes in the double mutant that do not correspond with induced heat tolerance**

| <b>AGI</b>              | <b>Col-0_2hr heat<br/>(Fold change)</b> | <b>Double<br/>Mutant_0hr<br/>(Fold change)</b> | <b>Gene Description</b>               |
|-------------------------|-----------------------------------------|------------------------------------------------|---------------------------------------|
| AT1G17170               | 0.69                                    | 4.28                                           | GST (tau class)                       |
| AT5G42800               | 0.16                                    | 4.27                                           | Dihydroflavanol reductase             |
| AT1G03495,<br>AT1G03940 | 0.6                                     | 3.91                                           | Anthocyanin transferase               |
| AT1G03495,<br>AT1G03940 | 0.23                                    | 3.65                                           | Leucoanthocyanidin dioxygenase        |
| AT5G17220               | 0.21                                    | 2.73                                           | GST (phi class)                       |
| AT3G16420,<br>AT3G16430 | 0.58                                    | 2.56                                           | PBP1                                  |
| AT4G14090               | 0.53                                    | 2.3                                            | Anthocyanidin 5-O-glucosyltransferase |
| AT1G52000               | 0.41                                    | 2.13                                           | Jacalin lectin family protein         |

**Supplementary Table 2: Primers used to amplify mitochondrial transcripts in qRT-PCR analyses.**

| <b>AGI</b> | <b>Forward Primer (5' – 3')</b> | <b>Reverse Primer (5' – 3')</b> |
|------------|---------------------------------|---------------------------------|
| ATMG00620  | ATCGGCCAATCACGCTATCTCCTT        | TCCCTCGTGTAGCTATGATGCCA         |
| ATMG00180  | TGGTGC GGCTTAGGTCAACTAACA       | TCGCAAACAACAACGTTTCCTTCCC       |
| ATMG00690  | AGTCAATCGTGCTGCTCTCGATCT        | AACGCCTGACGACGCCAGATATTA        |
| ATMG00660  | TTGGCGAAGCCAAGTTTCTTTCGG        | ACGTACACGCTTCCCTTTACTCCA        |
| ATMG00630  | TGCTGAAGTTGCGAATGAAGCGAC        | TGATCCGGGAAAGGTTAGTGCCAT        |
| ATMG00210  | GATTCCGCGCGGT CAGAAATTCAT       | AGTGCTTTGTCTGTGCTAGGTCACT       |
| ATMG00220  | AAGCTTAGCTAGCGCCATACCTGT        | ATGCAATGCGGCCAGATGAAGAAG        |
| ATMG00080  | ACCGGGAAACCCACAGAAGTAAGA        | TCGAGCATTTGCCAAACTCACACC        |
| ATMG00980  | TATATTTGCTCACATCCC GGCGCA       | TCTTCTCGACCCGGAATTCCCAT         |
| ATMG01360  | ATGGTTATGCCGGCGATGATAGGT        | TAGGAGCAAGAGACTTGGTGGCAA        |
| ATMG00270  | ATCCCAGTCTTTCGCGACACTTCA        | TCCCACTACTGGTAAATAGCGCA         |
| ATMG00610  | AACCACAAGAGTGCTCCAGGAACT        | ACGTTCTTCTCCAGCAACAGCCTA        |
| ATMG00470  | GCCGGCATTGCAAGCAAATAGAGA        | TAGCTTAACCTGAACCCGCAACT         |
| ATMG01350  | AGAGGAGAAGCTCTGCTCGACTTT        | AGTAGGAAAGGGT GCGTTCCTTGA       |
| ATMG00600  | TCATTAATGGGAAATGCGCGGAGC        | AAGAGAGGGCAATGAAGAAGGGCT        |
| ATMG00900  | TGGGATGCTCGTTTGACCTCTGTA        | ATCGGCTAATGCTCCAGGTTGAT         |
| ATMG01120  | CGAGTGAGATTGTCATGGCGCAAA        | ATTCAGCTTCCGCTTCTGGGAGAT        |
| ATMG01275  | TGTGCAACGTAGAAAGGGTCTTGA        | CCCGAGCGACCAGACTTAACATAA        |
| ATMG00285  | TCCGACCAAGAGAGGTTTGATGCT        | AAATATTTGAGCCGGCTTCCGTG         |
| ATMG01320  | GCCATGGCCCAAACGAAAGTCAAA        | CGGGTTTGCCGTAATGCTGAAACT        |
| ATMG00060  | TAGCGGATCAATTCCAACGAGCCT        | ATCCGAAACGCAGGAACGATCTGA        |
| ATMG00513  | AATCCGCGCAGATAGGATCGCATA        | AGTAGCTGCATGAATCGAAGCGGA        |
| ATMG00516  | ATATGGGTCCGTGCAGCATTTCCA        | AACAGGGACTACCCGAGCTAATGA        |
| ATMG00070  | ACCAGTGCAGACGAAGTAACACGA        | ACGGCGTAGATCCGGATGATTGAT        |
| ATMG01360  | ATGGTTATGCCGGCGATGATAGGT        | TAGGAGCAAGAGACTTGGTGGCAA        |
| ATMG00730  | TCCATGGCCTATTTCCGGGTTCACT       | TAGAACATCGCGCCACCATAACGAA       |
| ATMG01190  | ATAGGCCGTGGTCAACGAGA ACTT       | TCGAGCGTTTCTGTCCAATCGCTA        |
| ATMG00480  | TACGGAACCAACTGCTTTCACACC        | ACGGCCTTACACCATTGGGATACT        |

**Supplementary Table 3. List of genes with information regarding expression, relative to Col-0, in *msh1*, *recA3*, and *msh1 recA3*. Genes are considered altered in expression if p-value < 0.1 and absolute log fold change compared to wild type is greater than 1. Table available at <http://psiweb.unl.edu/mackenzie/supp/supp3.xls>**

**Supplementary Table 4. List of genes with information regarding expression, relative to Col-0 under normal conditions, in *msh1 recA3* under normal conditions, Col-0 under heat stress and *msh1 recA3* under heat stress. Genes are considered altered in expression if FDR < 0.1. Table available at <http://psiweb.unl.edu/mackenzie/supp/supp4.xls>**
